1 **Mutually Beneficial Symbiosis Between Human and Gut-Dominant *Bacteroides***  
2 **Species Through Bacterial Assimilation of Host Mucosubstances**

3

4 Masahiro Sato<sup>1</sup>, Kanta Kajikawa<sup>1</sup>, Tomoya Kumon, Daisuke Watanabe, Ryuichi  
5 Takase, and Wataru Hashimoto<sup>2</sup>

6

7 Laboratory of Basic and Applied Molecular Biotechnology, Division of Food Science  
8 and Biotechnology, Graduate School of Agriculture, Kyoto University, Uji, Kyoto 611-  
9 0011, Japan

10 <sup>1</sup>M.S. and K. K. contributed equally to this work.

11 <sup>2</sup>To whom correspondence may be addressed. Wataru Hashimoto; Laboratory of Basic  
12 and Applied Molecular Biotechnology, Division of Food Science and Biotechnology,  
13 Graduate School of Agriculture, Kyoto University, Uji, Kyoto 611-0011, Japan; Tel.:  
14 +81-774-38-3766; Email: [hashimoto.wataru.8c@kyoto-u.ac.jp](mailto:hashimoto.wataru.8c@kyoto-u.ac.jp)

15

16 Keywords: *Bacteroides* / glycosaminoglycans / microbiota / probiotics / short-chain  
17 fatty acids

18

1 **Abstract (228/250 words)**

2 The composition of gut microbiota is influenced by the quantity and type of nutrients in  
3 host. Even with some *Bacteroides* species being categorized as pathogens, *Bacteroides*  
4 is one of the most dominant gut bacteria. Here we indicate the physiological  
5 determinants of the species of *Bacteroides* for being dominant in human gut microbiota.  
6 Each of the host extracellular mucosubstances including glycosaminoglycans (GAGs)  
7 and mucin has grown human gut microbiota. In spite of the differences among initial  
8 microbiota profiles, *Bacteroides* species dominated the community when GAG (e.g.,  
9 chondroitin sulfate or hyaluronan) was used as a sole carbon source. In fact, GAGs and  
10 the *Bacteroides* genes which are vital for the degradation of GAGs were commonly  
11 detected in human feces. Mucin has encouraged the growth of *Bacteroides* and several  
12 other genera. A comprehensive analysis on the degradation and assimilation of  
13 mucosubstances by the genus *Bacteroides* using around 30 species has shown that most  
14 species degrade and assimilate GAGs and mucin, showing that *Bacteroides* species can  
15 survive even in the undernutrition condition including the fasting state. In the  
16 assimilation of GAG or mucin, *Bacteroides* species significantly secreted essential  
17 amino acids,  $\gamma$ -amino butyrate (GABA), and/or short-chain fatty acids which are needed  
18 for human health. This is the first report as regards mutually beneficial interaction  
19 between human and *Bacteroides* species via bacterial assimilation of host  
20 mucosubstances and secretion of metabolites for host health promotion.

21

22 **Significance (120/120 words)**

23 The genus *Bacteroides* is one of the most dominant gut bacteria, although its beneficial  
24 effects on human health have not been well understood. Here, we show modes of action

1 in human-*Bacteroides* interrelationship. Mucosubstances including GAGs and mucin  
2 secreted by human host are abundant in gut for microbiota to grow well. *Bacteroides*  
3 species are dominant in the community in the presence of GAGs, and provide human  
4 host with a considerable amount of essential amino acids,  $\gamma$ -amino butyrate, and short-  
5 chain fatty acids produced from mucosubstances. These results postulate mutually  
6 beneficial symbiosis system between human and *Bacteroides* through bacterial  
7 assimilation of host mucosubstances and secretion of metabolites for human body and  
8 mental health promotion even in the undernutrition condition including the fasting state.

9

## 10 **Introduction**

11 In the human gut, there are 100 trillion bacteria communicating with each other and  
12 forming a complex microbiota (1). The gut microbiota's composition is influenced by  
13 different host diets and metabolizable nutrition for bacteria (2). Contrarily, gut bacteria  
14 colonize mucosubstances including mucus layer mucin or extracellular matrix  
15 glycosaminoglycan (GAG) made by the host to preserve the intestine (3). Mucin is  
16 among the principal components of the mucus layer of the intestine and is comprised of  
17 the main chain protein and side chain sugars (e.g., *N*-acetylglucosamine (GlcNAc), *N*-  
18 acetylgalactosamine (GalNAc), galactose, fucose, sialic acid) (4). GAG is comprised of  
19 a two-sugar component-repeated structure, uronate like iduronic acid or glucuronic acid  
20 (GlcUA), and amino sugar including GlcNAc or GalNAc (5). In amino sugars, both  
21 hydroxyl and amino groups are highly sulfated. GAG is categorized into chondroitin  
22 sulfate (CS), hyaluronic acid (HA), heparin (HP), heparan sulfate, dermatan sulfate, and  
23 keratan sulfate based on constituent sugar, glycoside bond manner, and the level of  
24 sulfated groups (5).

1       Some human gut bacteria, for example, *Bacteroides*, *Clostridium*, *Enterococcus*, and  
2       *Streptococcus* genera, break down GAGs that are supplied by the host intestine which  
3       are not dependent on intake of meals (6-9). Our previous studies have exhibited  
4       molecular machineries of depolymerization, import, degradation, and metabolism of  
5       GAGs in the genus *Streptococcus* (10, 11) (*SI Appendix*, Fig. S1). Mainly among these  
6       gut bacteria, *Bacteroides* species assimilate polysaccharides that are supplied by the  
7       host and colonize the colon intestinal mucus layer as the largest group in humans in  
8       spite of race (12-14), even though the genus *Bacteroides* is often classified as an  
9       opportunistic pathogen (15). *Bacteroides thetaiotaomicron* assimilates both mucin O-  
10      binding polysaccharides and GAGs including CS, HA, and HP (16-18).

11      On the other hand, short-chain fatty acids which are made by some gut bacteria  
12      positively influence the host physiology, for example (19), (i) improve the gut  
13      environment by decreasing the pH, (ii) adjust the host immune system, (iii) be the  
14      energy source of the host, (iv) improve insulin resistance, and (v) decrease the risk of a  
15      heart attack. Some species of *Bacteroides* can create short-chain fatty acids (20),  
16      indicating their function as next-generation probiotics (15, 21, 22). For one to know the  
17      reason why humans allow *Bacteroides* species to be dominant in gut microbiota and  
18      why humans do not repress the bacterial species, this article deals with the mechanism  
19      of symbiosis between humans and gut-dominant genus *Bacteroides* through  
20      comprehensive analyses to explore *Bacteroides* species capability to degrade as well as  
21      assimilate human mucosubstances (GAGs and mucin) and to dictate bacterial  
22      metabolites during the human secretion assimilation.

23

24      **Results**

1 **GAG Is Available to Human Gut Microbiota.** Extracellular matrices under the mucus  
2 layer which is comprised of mucin (23) are generally composed of GAGs, including CS,  
3 HA, and HP. Since the mucus layer hinders bacteria from invading the host cells (24),  
4 these bacteria can hardly utilize GAGs. On the contrary, human feces have components  
5 from epithelial cell shedding (25), indicating that GAGs that are from the intestinal  
6 tracts are available to the gut microbiota. Therefore, the concentration of GAGs,  
7 especially those in sulfated forms, in feces was measured using the 1,9-dimethyl-  
8 methylene blue (DMMB) method (26). The contents of GAGs in independent feces  
9 from three volunteers A to C (two twenties and one fifties) were as follows: volunteer  
10 A, 0.098% (w/w); volunteer B, 0.112%; and volunteer C, 0.033%. These values are  
11 similar to those of GAGs that are part of bacterial media, indicating that there are plenty  
12 GAGs in the human gut for microbiota to grow well. In fact, *B. thetaiotaomicron* has  
13 shown a remarkable growth in the minimal medium with the use of 0.02% (w/v) GAG  
14 (HA) as a sole carbon source (*SI Appendix*, Fig. S2).

15 ***Bacteroides* Species Are Dominant in the Community in the Presence of GAG.** To  
16 explore the effects of carbon sources on human gut microbiota, fecal samples were  
17 cultured for 48 hours in a minimal medium that contains glucose, mucin, or  
18 representative GAG (i.e., chondroitin sulfate C (CSC), HA, or HP) as a sole carbon  
19 source. Microbes in independent samples from three donors (one twenties, one thirties,  
20 and one fifties) has exhibited vigorous growth in each medium (*SI Appendix*, Fig. S3),  
21 indicating that microbes are present to degrade and/or assimilate GAG or mucin. The  
22 collected microbiota samples before and after growth were subjected to 16S rDNA  
23 amplicon sequence analysis (Fig. 1). Prior to cultivation, each sample had a wide  
24 variety of bacteria (Fig. 1A): Donors A, B, and C comprised of *Bifidobacterium*,

1 *Prevotella*, and *Bacteroides* as the major genera, respectively. *Collinsella*, *Blautia*,  
2 *Faecalibacterium*, and *Dialister* genera were also detected well. The frequency of  
3 *Bacteroides* species ranged from 1.9 to 27.2%; among them, both *B. vulgatus* and *B.*  
4 *dorei* were most commonly observed. Succeeding cultivation for 24 hours in the  
5 presence of glucose, various genera such as *Bacteroides*, *Bifidobacterium*,  
6 *Erysipelatoclostridium*, and *Escherichia* propagated, even though many other early  
7 genera or species decayed. In a mucin-containing medium, *Collinsella* and *Blautia*  
8 genera also increased or maintained the frequency. Contrarily, only the *Bacteroides*  
9 species, especially *B. ovatus* and *B. xylanisolvens*, predominated the community (over  
10 50% of total amplicons) in a GAG-containing medium in any donor sample. In view of  
11 the low initial frequency of both *B. ovatus* and *B. xylanisolvens* (0.0–1.7% and 0.0–  
12 0.6%, respectively), these species exhibited the best adaptive fitness to the used  
13 experimental conditions with GAG. Altogether, our data indicate that carbon sources  
14 are the key determinants in microbiota formation and maintenance.

15 Principal component analysis (PCA) was done with the use of 0- and 24-hour data of  
16 averaged genus (or *Bacteroides* species) frequency (Fig. 1B). The first and second  
17 principal components (PC1 and PC2) accounted for 35.0% and 23.3% of the variance,  
18 respectively. Both the factor loading plot and the PCA score plot have shown that the  
19 majority of *Bacteroides* species, such as *B. ovatus*, *B. xylanisolvens*, *B. uniformis*, *B.*  
20 *finegoldii*, and *B. faecis*, formed a cluster with large negative PC1 values, corresponding  
21 to the high frequency in CSC, HA, or HP-containing medium. Therefore, GAG may be  
22 one of the reasons for the dominance of most *Bacteroides* species in gut microbiota.  
23 The growth profiles of six major genera, exhibited from the growth curves of whole  
24 microbiota and the genus frequency in the microbiota, further supported that

1 *Bacteroides* species prefer GAG than glucose or mucin (*SI Appendix*, Fig. S4),  
2 although, based on Fig. 1B, both *B. vulgatus* and *B. dorei* were plotted apart from the  
3 major *Bacteroides* group. The frequency of these two species was relatively high prior  
4 to cultivation but was lesser when GAG was used as a carbon source. Mucin was the  
5 only carbon source to grow the *Bacteroides* as well as five other major genera (*SI*  
6 *Appendix*, Fig. S4).

7 **Most *Bacteroides* Degrade GAGs.** Since *Bacteroides* species prefer GAGs, their  
8 GAG-degrading abilities were assessed with the use of CSC, HA, and HP. We have  
9 earlier reported the degradation of GAGs by 6 *Bacteroides* species of 11 species tested  
10 through the halo assay with the use of GAG minimal medium plates (9). The detection  
11 of halo means there is a degradation of GAGs (27). Thus, to assess GAG degradation as  
12 one of the common characteristics among *Bacteroides* species, the other 17 species  
13 were also subjected to the halo assay (*SI Appendix*, Fig. S5), thus finding that *B. caccae*,  
14 *B. faecis*, and *B. finegoldii* degrade CSC. Additionally, *B. caccae*, *B. faecis*, *B.*  
15 *finegoldii*, *B. nordii*, and *B. xylanisolvens* were found to be novel HA-degrading  
16 *Bacteroides*. Contrarily, the species tested here do not degrade HP, showing that  
17 *Bacteroides* species prefer both CSC and HA containing 1,3-glycoside bond than HP  
18 containing 1,4-glycoside bond.

19 We then conducted the halo assay for the confirmation of the GAG-degrading ability  
20 of *Bacteroides* species under high nutrition conditions (Fig. 2). The nutrient-rich  
21 medium (Gifu Anaerobic Medium: GAM) plate was used for the halo assay since some  
22 *Bacteroides* species showed little growth in the GAG minimal plate, due to the lack of  
23 essential components including cysteine which is used for a reducing agent. In addition  
24 to 17 species used for the halo assay with GAG minimal plate, 8 other species were

1 investigated with the use of the GAM plate. Because there was no precipitation formed  
2 in the HA-containing GAM plate, HA was not appropriate for this halo assay under  
3 high-nutrition conditions. In addition to CSC-degrading *Bacteroides* species found on  
4 the minimal medium plate, six species were found to degrade CSC: *B. cellulosityticus*,  
5 *B. eggerthii*, *B. fluxus*, *B. gallinarum*, *B. massiliensis*, and *B. oleiciplenus*. However, in  
6 the case of HP minimal medium, there were no *Bacteroides* species found to degrade  
7 HP; the HP-containing GAM plate formed a halo, so that nine species exhibited HP-  
8 degrading ability as follows: *B. clarus*, *B. coprosuis*, *B. eggerthii*, *B. faecis*, *B.*  
9 *finegoldii*, *B. intestinalis*, *B. ovatus*, *B. stercoris*, and *B. thetaiotaomicron*. All in all, 18  
10 of 28 *Bacteroides* species that were tested showed GAG (CSC, HA, and/or HP)-  
11 degrading ability (*SI Appendix*, Table S1).

12 **Assimilation of GAGs by *Bacteroides* Species.** The assimilation of GAGs by 29  
13 *Bacteroides* species was further investigated by monitoring the optical density at 600  
14 nm (OD<sub>600</sub>) of the bacterial culture in the liquid minimal medium such as CSC, HA, or  
15 HP as a sole carbon source (Fig. 3a, *SI Appendix*, Fig. S6), resulting in the growth of 20  
16 species in the presence of CSC as follows: *B. barnesiae*, *B. caccae*, *B. cellulosityticus*,  
17 *B. clarus*, *B. coagulans*, *B. coprocola*, *B. coprophilus*, *B. eggerthii*, *B. faecis*, *B.*  
18 *finegoldii*, *B. fluxus*, *B. gallinarum*, *B. intestinalis*, *B. massiliensis*, *B. nordii*, *B.*  
19 *oleiciplenus*, *B. ovatus*, *B. stercoris*, *B. thetaiotaomicron*, and *B. xylanisolvens*. In the  
20 case of HA, 15 species proliferated, that is, *B. barnesiae*, *B. caccae*, *B. clarus*, *B.*  
21 *coagulans*, *B. coprocola*, *B. coprophilus*, *B. faecis*, *B. finegoldii*, *B. fluxus*, *B.*  
22 *gallinarum*, *B. massiliensis*, *B. nordii*, *B. ovatus*, *B. thetaiotaomicron*, and *B.*  
23 *xylanisolvens*. HP was assimilated by 13 species as follows: *B. clarus*, *B. eggerthii*, *B.*  
24 *faecis*, *B. finegoldii*, *B. fluxus*, *B. gallinarum*, *B. intestinalis*, *B. massiliensis*, *B. nordii*,



1 *B. ovatus*, *B. stercoris*, *B. thetaiotaomicron*, and *B. xylanisolvens*. There is no species  
2 that has shown growth without GAGs, showing that these species grew by assimilating  
3 GAGs as a sole carbon source.

4 The time-dependent decrease of GAG concentration in the CSC minimal medium  
5 was examined during the growth of *B. faecis* as a representative. In accordance to the  
6 OD<sub>600</sub> increase of the bacterial culture broth, there was a concentration decrease of  
7 CSC, and the polysaccharide was finally totally consumed (Fig. 3B). This result has  
8 directly shown that CSC was assimilated by *B. faecis*. In total, 20 species of 29  
9 *Bacteroides* species that were tested here assimilate GAGs (*SI Appendix*, Table S1).

10 In the majority of *Bacteroides* species, the growth profiles in human gut microbiota  
11 (Fig. 1B) and in pure culture (Fig. 3A) were quite steady: *B. ovatus*, *B. xylanisolvens*, *B.*  
12 *fingoldii*, and *B. faecis* in the major *Bacteroides* group showed high assimilation  
13 ability, while *B. vulgatus* and *B. dorei* did not have GAG utilization. However, a major-  
14 group species (*B. uniformis*) has no degradation or assimilation of GAG. Such species  
15 could not feed by themselves on GAG but may grow in microbiota with the help of  
16 GAG-degrading/ GAG-assimilating bacteria.

17 **Frequent Detection of GAG Lyase Gene in Human Gut Microbiota.** As a first step  
18 of bacterial action on GAGs, bacterial GAG lyases are very important for  
19 depolymerization of GAGs (*SI Appendix*, Fig. S1). Among these, HA/CS and heparan  
20 sulfate lyases are categorized as Polysaccharide Lyase Families 8 (PL8) and PL12,  
21 respectively, in the database CAZy (<http://www.cazy.org/>) (6, 16, 17). The primers to  
22 amplify these lyase genes were designed by referring to those genes in four *Bacteroides*  
23 species as follows: *B. cellulosilyticus*, *B. ovatus*, *B. thetaiotaomicron*, and *B.*  
24 *xylanisolvens*. Family PL8 and PL12 GAG lyase genes were discovered from three

1 independent feces, and their frequency was 6.0%, 0.85%, and 3.2% in human gut  
2 microbiota on the basis of the bacterial cells calculated from 16S rDNA amplification  
3 (*SI Appendix*, Table S2). These values were reasonable based on the frequency of  
4 *Bacteroides* species in fecal samples as described above.

5 **Assimilation of Mucin by *Bacteroides* Species.** Besides GAG, the assimilation of  
6 mucin was assessed with the use of 28 *Bacteroides* species on the purified mucin  
7 minimal medium. Although no *Bacteroides* species showed a significant growth on the  
8 medium without mucin, 15 species assimilated mucin as follows: *B. caccae*, *B. clarus*,  
9 *B. coprosuis*, *B. faecis*, *B. finegoldii*, *B. fragilis*, *B. gallinarum*, *B. helcogenes*, *B.*  
10 *intestinalis*, *B. nordii*, *B. ovatus*, *B. stercoris*, *B. thetaiotaomicron*, *B. uniformis*, and *B.*  
11 *xylanisolvans* (Fig. 3A, *SI Appendix*, Table S1). Among the mentioned species, six, *B.*  
12 *clarus*, *B. coprosuis*, *B. faecis*, *B. gallinarum*, *B. helcogenes*, and *B. nordii*, were the  
13 first ones to show mucin assimilation. Since commercially available mucin contained  
14 GAGs, the amount of sulfated GAGs in the purified mucin was measured using the  
15 DMMB method, resulting in the purified mucin containing 7–8% (w/v) of GAGs, which  
16 corresponds to 0.02% (w/v) GAGs included in 0.25% (w/v) mucin medium which is  
17 used for the growth assay. To remove the possibility that *Bacteroides* species  
18 assimilated only GAG in the mucin minimal medium, *B. thetaiotaomicron* was cultured  
19 in 0.25% (w/v) mucin or 0.02% (w/v) GAG minimal medium. As a consequence, there  
20 was a higher growth level on mucin than that on GAG (*SI Appendix*, Fig. S2), showing  
21 that the bacterial cells assimilated mucin.

22 ***Bacteroides* Species Utilize GAG or Mucin as a Sole Nitrogen Source.** Nitrogen is  
23 one of the essential elements, despite its limited quantity in the gut environment.  
24 Therefore, bacteria need to acquire nitrogen to be indigenous in the colon. Because

1 nitrogen is included in GAG or mucin, we tested whether *Bacteroides* species can use  
2 HA or mucin as a sole nitrogen source (*SI Appendix*, Fig. S7). Three species, *B.*  
3 *thetaiotaomicron*, *B. ovatus*, and *B. faecis*, have shown a remarkable growth even in  
4 nitrogen-restricted GAG or mucin medium. In the meantime, these three species showed  
5 no growth in nitrogen-restricted glucose medium, even though they grew well in the  
6 presence of ammonium sulfate. *Bacteroides* species can, therefore, use GAG or mucin  
7 as carbon and nitrogen sources. This feature is one of the reasons why *Bacteroides*  
8 species have dominance in the gut environment.

### 9 **Metabolites from *Bacteroides* Species during Assimilation of Host Mucosubstances.**

10 Metabolites in the culture broth secreted by *B. thetaiotaomicron* or *B. ovatus* were  
11 investigated in the GAG (HA) or mucin minimal medium, resulting in the detection of  
12 19 kinds of standard amino acids,  $\gamma$ -amino butyrate (GABA),  $\alpha$ -amino butyrate, and  
13 ethanol amine (Fig. 4A). A huge amount of Ala was seen under all conditions, and  
14 GABA, Glu, and Val were remarkably secreted when HA was assimilated. On the  
15 contrary, when the bacterial cells assimilated mucin, there was an excretion of basic  
16 amino acids, for example, Lys and Arg. Moreover, organic acids were also investigated.  
17 Three *Bacteroides* species, *B. thetaiotaomicron*, *B. ovatus*, and *B. faecis*, grown in the  
18 HA minimal medium secrete short-chain fatty acids including acetic and propionic acids  
19 as well as lactic, succinic, and/or formic acids (Fig. 4B).

20

### 21 **Discussion**

22 Based on the above-described results, we have discussed the following: Since GAGs  
23 and mucin are constantly supplied in human gut independent from nutrient intake by the  
24 host, GAG or mucin assimilation abilities are necessary for survival of dominant

1 bacteria in the human gut, supporting the hypothesis that assimilation of GAG or mucin  
2 is essential for gut microbiota dominance in the human gut. In fact, the abundance of  
3 *Bacteroides* species in the gut microbiota has increased in female mice by oral  
4 administration of chondroitin sulfates A and C (28). The gene expression involved in  
5 the assimilation of GAGs is also upregulated in *Bacteroides* species in the presence of  
6 GAGs (18, 29). As regards structure, GAG is simpler than mucin, so that GAG may be  
7 degraded easier than mucin (3, 30). Indeed, more species have shown an assimilation  
8 ability toward GAG rather than mucin (Fig. 3A, *SI Appendix*, Table S1).

9 Amino acids secreted by gut microbiota are used by the host as well as other gut  
10 bacteria (31). *Bacteroides* species grown in GAG or mucin minimal medium secreted  
11 most of the standard amino acids and organic acids such as short-chain fatty acids (Fig.  
12 4), showing that the host human and other bacteria can assimilate these metabolites.  
13 Additionally, *Bacteroides* species could provide important amino acids to host human  
14 by converting host GAGs to those amino acids which are not dependent from nutrient  
15 intake by the host. Even with the weight of gut microbiota of about 1.5 kg and  
16 *Bacteroides* species being dominant species (~50% of total), the amount of secreted  
17 amino acids is not negligible, even though amino acids are generally absorbed by the  
18 small intestine and *Bacteroides* species are broadly distributed from the stomach to the  
19 large intestine (32). The quantities of amino acids produced by *Bacteroides* species are  
20 almost equal to the recommended amount for a person on a day by the WHO (*SI*  
21 *Appendix*, Table S3), indicating that the human obtains a considerable amount of  
22 nutrition from metabolites secreted by gut microbiota. In the recent time, *Bacteroides*  
23 species produce much GABA, and negative correlation is apparent between their  
24 abundance and depressive symptoms (33), showing that GABA which is produced by

1 human gut microbiota is as a signal molecule in the enteric nervous system (34). Thus,  
2 besides nutritional effects, *Bacteroides* species producing GABA from the host GAG  
3 may be a contributing factor to human mental health.

4 Furthermore, gut microbiota is involved in host immunity and/or energy source via  
5 the secretion of organic acids such as short-chain fatty acids (19). For the most part,  
6 short-chain fatty acids which are very important to the host are produced at 50–100 mM  
7 in the colonic lumen by gut microbiota (35, 36). Based on the secretion level from the  
8 mucosubstances (GAG and mucin) (Fig. 4B), *Bacteroides* species are the main  
9 producers of short-chain fatty acids in the human gut. Since the intestine mucus of the  
10 host is supplied inside of the gut which is independent from the nutrient uptake by the  
11 host, *Bacteroides* species should supply physiologically essential molecules to the host  
12 or other bacteria under fasting conditions. These results support the fact that  
13 *Bacteroides* species are known as the next-generation probiotics (15, 22) and/or  
14 pharmabiotics (34).

15 The overall results acquired here hypothesized that there is a mutually beneficial  
16 relationship model between *Bacteroides* species and the human host (Fig. 4C). It is  
17 essential for humans to secrete extracellular gut mucosubstances including GAGs and  
18 mucin for the maintenance of cell structure/function and prevention of inflammation  
19 due to pathogenic bacteria. Some gut bacteria convert these mucosubstances to essential  
20 molecules for the host. This mutual beneficial relationship has probably been accepted  
21 as a result of natural selection in the human gut. For humans, *Bacteroides* species in the  
22 gut leads to the promotion of host health by providing amino acids and organic acids  
23 such as short-chain fatty acids, so that the human immune system has not excluded  
24 *Bacteroides* species from the gut. On the contrary, for the *Bacteroides* species, the

1 human gut is a well-organized place to survive due to the continuous supply of large  
2 quantities of mucosubstances in which *Bacteroides* species can assimilate dominantly in  
3 human gut microbiota. Human health is also necessary for *Bacteroides* species to keep  
4 the residence place safe.

5 Finally, the mutually beneficial symbiosis between humans and gut-dominant  
6 *Bacteroides* species is posited via bacterial assimilation of host mucosubstances and  
7 secretion of metabolites for host health promotion.

8

## 9 **Materials and Methods**

10 **Materials.** HA and DMMB were purchased from Sigma-Aldrich. Mucin from porcine  
11 stomach and CSC were acquired from Wako. HP was from Nacalai Tesque. The  
12 nutrition-rich medium, GAM, was from Nissui Pharmaceutical Co. All other analytical  
13 grade chemicals utilized in this study were available commercially. The feces were  
14 kindly given to us as gifts by the Japanese volunteers. Informed consent was acquired  
15 from all subjects, and experiments with the use of these feces were approved by the  
16 Committee of Research Activity Promotion of Graduate School of Agriculture, Kyoto  
17 University.

18 **Purification of GAG and Mucin.** Low-molecular-weight molecules contaminated in  
19 each GAG reagent were removed by dialysis against pure water. Unless otherwise  
20 stated, the percent concentration represents w/v. Mucin was dissolved at a 2% final  
21 concentration in 20 mM potassium phosphate buffer (pH 7.8), which contains 0.1 M  
22 NaCl. Several drops of toluene were placed in the mucin suspension, which is followed  
23 by stirring for 1 hour at room temperature. The suspension was then adjusted to a pH of  
24 7.2 with 2 M NaOH and stirred for 23 hours at room temperature. The supernatant was

1 collected after centrifugation (4°C, 10,000×g, 10 min). Cold ethanol was then added to  
2 become 60% (v/v), for the precipitation of mucin to occur. Centrifugation was done  
3 with the same condition, and the resultant pellet was then dissolved in 0.1 M NaCl. The  
4 addition of ethanol followed by centrifugation was repeated twice. The last step was to  
5 dissolve the pellet in pure water (80 mL) instead of 0.1 M NaCl. This solution was  
6 dialyzed against pure water and then freeze-dried to obtain the purified mucin (37).

7 **Bacteria Strains.** A total of 30 *Bacteroides* species was utilized in this study. Among  
8 them, 29 species were purchased from Japan Collection of Microorganisms (JCM), such  
9 as *B. acidifaciens* JCM10556, *B. barnesiae* JCM13652, *B. caccae* JCM9498, *B.*  
10 *cellulosilyticus* JCM15632, *B. clarus* JCM16067, *B. coagulans* JCM12528, *B.*  
11 *coprocola* JCM12979, *B. coprophilus* JCM13818, *B. coprosuis* JCM13475, *B. dorei*  
12 JCM13471, *B. eggerthii* JCM12986, *B. faechinchillae* JCM17102, *B. faecis* JCM16478,  
13 *B. finegoldii* JCM13345, *B. fluxus* JCM16101, *B. fragilis* JCM11019, *B. gallinarum*  
14 JCM 13658, *B. helcogenes* JCM6297, *B. intestinalis* JCM13265, *B. massiliensis*  
15 JCM13223, *B. nordii* JCM12987, *B. oleiciplenus* JCM16102, *B. ovatus* JCM5824, *B.*  
16 *paurosaccharolyticus* JCM15092, *B. salanitronis* JCM13657, *B. stercoris* JCM9496, *B.*  
17 *thetaitaomicron* JCM5827, *B. uniformis* JCM5828, and *B. xylanisolvens* JCM15633.

18 In addition to this, *B. vulgatus* NBRC14291 was from the Biological Resource Center in  
19 the National Institute of Technology and Evaluation (NBRC/NITE).

20 **16S rDNA Amplicon Sequence Analysis.** There is approximately 1 g of human fecal  
21 sample dissolved in 10 mL of sterilized saline (0.9% NaCl). A 300-μL aliquot of this  
22 suspension was inoculated into a test tube which contains 15 mL of assimilation  
23 validation liquid medium [0.1% ammonium sulfate, 0.226% KH<sub>2</sub>PO<sub>4</sub>, 0.09% KH<sub>2</sub>PO<sub>4</sub>,  
24 0.0004% FeSO<sub>4</sub>(II), 0.09% NaCl, 0.0027% CaCl<sub>2</sub>/2H<sub>2</sub>O, 0.002% MgCl<sub>2</sub>/6H<sub>2</sub>O, 0.001%

1 MnCl<sub>2</sub>/4H<sub>2</sub>O, 0.001% CoCl<sub>2</sub>, 0.0005% hemin, 0.00001% vitamin K<sub>1</sub>, 0.00001%  
2 ethanol, 0.0000005% vitamin B<sub>12</sub>, and 0.04% L-cysteine, with or without 0.25%  
3 glucose, dialyzed GAG (CSC, HA, or HP) or the purified mucin]. After being  
4 anaerobically cultured at 37°C for 24 or 48 hours, cells acquired after centrifugation  
5 were washed using the sterilized saline and immediately frozen in liquid nitrogen.

6 Both DNA extraction from human gut microbiota and 16S rDNA amplicon sequence  
7 analysis were performed by TechnoSuruga Laboratory Co., based on a previously  
8 reported method (38). In summary, the V3–V4 region of 16S rDNA was amplified with  
9 the use of the 341F/R806 primer sets. Sequencing was conducted using a paired-end,  
10 2×300-bp cycle run on a MiSeq sequencing system (Illumina) and MiSeq Reagent Kit  
11 version 3 (600 cycle) chemistry. After the sequencing was done, image analysis, base  
12 calling, and error estimation were done with the use of the Illumina Real-Time Analysis  
13 software (version 1.17.28). Paired-end sequencing with read lengths of approximately  
14 430 bp was done as well. Succeeding the demultiplexing, a clear overlap in the paired-  
15 end reads was seen. This made paired reads be joined together with the fastq-join  
16 program. Only reads that had quality value (QV) scores of ≥ 20 for more than 99% of  
17 the sequence were extracted for supplemental analysis. Metagenome@KIN software  
18 (World Fusion) was utilized for homology searching with the determined 16S rDNA  
19 sequences, against the DB-BA13.0 microbial identification database (TechnoSuruga  
20 Laboratory) (39, 40). Bacterial species were then identified based on the data from 97%  
21 similarity cut-off with DB-BA13.0. All sequences have been deposited in the DNA  
22 Data Bank of Japan (DDBJ) under the accession number DRA010273.

23 **GAG Quantitation.** Fecal samples (about 2 g) acquired from three volunteers were  
24 dissolved in 50 mL of pure water followed by overnight rotation. Centrifugation and



1 filtration were done for insoluble residues to be removed. The reagent DMMB  
2 determined the GAG content at a final concentration of 0.0016% in 0.304% glycine,  
3 0.16% NaCl, and 0.057% (v/v) acetic acid as quantitative reagent (26). Standard curve  
4 was made using a variety of CSC concentrations (0, 10, 20, 30, 40, and 50 mg/mL). The  
5 absorbance at 525 nm ( $Abs_{525}$ ) was measured after 80  $\mu$ L of samples and 800  $\mu$ L of  
6 quantitative solution were mixed. To remove the effect of other contaminated materials  
7 toward  $Abs_{525}$  in feces,  $Abs_{525}$  values of tenfold diluted fecal samples with pure water  
8 were measured and subtracted from  $Abs_{525}$  values of DMMB when GAGs in feces were  
9 quantified.

10 **Halo Assay for the Detection of GAG Degradation.** *Bacteroides* species were grown  
11 in an anaerobic condition at 37°C overnight in 5 ml of liquid GAM (1% peptone, 0.3%  
12 soy peptone, 1% proteose peptone, 1.35% digested serum powder, 0.5% yeast extract,  
13 0.22% meat extract, 0.12% liver extract, 0.3% glucose, 0.25%  $KH_2PO_4$ , 0.3% NaCl,  
14 0.5% soluble starch, 0.03% L-cysteine hydrochloride, and 0.03% sodium thioglycolate)  
15 as a preculture. The preculture broth (1 mL) was centrifuged at 9,700 $\times$ g for 5 min, and  
16 the resulting pellet (bacterial cells) was then washed with 1 mL of sterilized saline  
17 (0.9% NaCl), which is followed by centrifugation (9,700 $\times$ g, 5 min). The pellet was  
18 suspended in saline to acquire  $OD_{600} = 1$ . The cell suspension (10  $\mu$ L) was seen on the  
19 center of the halo minimal medium plate [0.1% yeast extract, 0.1%  $KH_2PO_4$ , 0.1%  
20  $Na_2HPO_4$ , 0.01%  $MgSO_4/7H_2O$ , 1% bovine serum albumin (BSA), 0.2% dialyzed GAG  
21 (CSC, HA, or HP), and 1% agar]. The plate was incubated in an anaerobic condition at  
22 37°C for 7 days. Afterward, 1 mL of 2 M acetic acid was spread on the plate to form  
23 white precipitation of the BSA-GAG complex. In the case of GAG-degrading bacteria,  
24 halo (clear zone) was seen on the plate due to the lack of GAG polymer (27).

1 For some *Bacteroides* species with a little growth in the halo minimal medium plate,  
2 the nutrition-rich halo medium plate was also utilized. This plate has GAM to supply a  
3 proper reducing agent for anaerobic bacteria as follows: 0.4% peptone, 0.12% soy  
4 peptone, 0.4% proteose peptone, 0.54% digested serum powder, 0.2% yeast extract,  
5 0.088% meat extract, 0.048% liver extract, 0.12% glucose, 0.1% KH<sub>2</sub>PO<sub>4</sub>, 0.12% NaCl,  
6 0.2% soluble starch, 0.012% L-cysteine hydrochloride, 0.012% sodium thioglycolate,  
7 1% BSA, and 0.2% dialyzed GAG (CSC or HP).

8 **Assimilation Assay.** To investigate the mucosubstance assimilation by *Bacteroides*  
9 species, OD<sub>600</sub> of the culture broth was measured after their inoculation into a variety of  
10 liquid media. *Bacteroides* species precultured in liquid GAM was centrifuged at  
11 15,000×g for 10 min, and the resulting pellet (bacterial cells) was washed using  
12 sterilized saline (0.9% NaCl). The bacterial cells were washed thrice and finally  
13 suspended in saline to acquire OD<sub>600</sub> = 1. The cell suspension (300 μL) was inoculated  
14 into 15 mL of the modified assimilation validation liquid medium (41) [0.1%  
15 ammonium sulfate, 0.226% KH<sub>2</sub>PO<sub>4</sub>, 0.09% KH<sub>2</sub>PO<sub>4</sub>, 0.0004% FeSO<sub>4</sub> (II), 0.09%  
16 sodium chloride, 0.0027% CaCl<sub>2</sub>/2H<sub>2</sub>O, 0.002% MgCl<sub>2</sub>/6H<sub>2</sub>O, 0.001% MnCl<sub>2</sub>/4H<sub>2</sub>O,  
17 0.001% CoCl<sub>2</sub>, 0.0005% hemin, 0.00001% vitamin K<sub>1</sub>, 0.00001% ethanol, 0.0000005%  
18 vitaminB<sub>12</sub>, 0.04% L-cysteine, and 0.25% dialyzed GAG (CSC, HA, or HP) or the  
19 purified mucin] and was further cultured at a temperature of 37°C with anaerobic  
20 conditions. The negative control, validation liquid medium with no inoculation, was  
21 also incubated to check the background of OD<sub>600</sub>. For *B. faecis*, OD<sub>600</sub> of the bacterial  
22 culture with CSC as a sole carbon source was monitored by measuring the CSC  
23 concentration.

1 Three species, *B. faecis*, *B. ovatus*, and *B. thetaiotaomicron*, were grown in nitrogen-  
2 restricted medium (assimilation validation liquid medium without ammonium sulfate)  
3 with HA, mucin, or glucose present as a sole carbon source to check whether these  
4 bacterial cells can use GAG or mucin as a sole nitrogen source. As indicated above,  
5 bacterial growth was monitored by measuring OD<sub>600</sub> of the culture broth.

6 **Metagenomics of Gut Bacteria for GAG Degradation.** Metagenomics were  
7 accomplished with the use of fecal samples from three volunteers. The analyses were  
8 conducted by TechnoSuruga Laboratory Co. DNA primers, for the amplification of  
9 GAG lyase genes, were designed by referring to family PL8 and PL12 lyase gene  
10 sequences found in database CAZy (<http://www.cazy.org/>) as follows: PL8 forward,  
11 CTSGAYGGDGCMAVAAAYATAGA; PL8 reverse,  
12 TTTCCATCGGGAGWDCCRGCHAD; PL12 forward,  
13 RAYTAYCCVGGWYTRGARAAAG; and PL12 reverse,  
14 WCCAYTKATGRCGATGMADYTG. The total bacterial cell numbers were estimated  
15 by real-time PCR with the use of primers which are specific to 16S rDNA.

16 **Metabolic Assay of *Bacteroides* Species through Assimilation of GAG or Mucin.**

17 Three species, *B. faecis*, *B. ovatus*, and *B. thetaiotaomicron*, were cultured in the  
18 assimilation validation liquid medium that contained HA or mucin as a sole carbon  
19 source. Organic acids in the bacterial culture broth for 48 hours were measured by  
20 TechnoSuruga Laboratory Co. at 45°C of the column oven temperature and 0.8 mL/min  
21 of flow rate with the use of 5 mM *p*-toluenesulfonic acid as a solvent by HPLC system  
22 (Shimadzu) that is equipped with a column of Shim-pack SCR-102(H) and electrical  
23 conductivity detector of CDD-10A. As regards *B. thetaiotaomicron* and *B. ovatus*, the  
24 bacterial culture broth was also subjected to Amino Acid Analyzer L-8900 (Hitachi

1 High-Technologies) which is equipped with a column of #2622SC-PF and a detector of  
2 photometer in the Global Facility Center of Hokkaido University. Free amino acids  
3 were seen at wavelengths of 570 and 440 nm by the post-staining method with  
4 ninhydrin. Before analyses, mucin was taken out with the use of ethanol precipitation.  
5 The medium with no cells was also investigated as a background.

6

## 7 **References**

- 8 1. A. Suau *et al.*, Direct analysis of genes encoding 16S rRNA from complex  
9 communities reveals many novel molecular species within the human gut. *Appl.*  
10 *Environ. Microbiol.* **65**, 4799–4807 (1999).
- 11 2. S. A. Smits *et al.*, Seasonal cycling in the gut microbiome of the Hadza hunter-  
12 gatherers of Tanzania. *Science* **357**, 802–806 (2017).
- 13 3. E. C. Martens, H. C. Chiang, J. I. Gordon, Mucosal glycan foraging enhances  
14 fitness and transmission of a saccharolytic human gut bacterial symbiont. *Cell*  
15 *Host Microbe* **4**, 447–457 (2008).
- 16 4. R. Bansil, B. S. Turner, The biology of mucus: Composition, synthesis and  
17 organization. *Adv. Drug Deliv. Rev.* **124**, 3–15 (2018).
- 18 5. N. S. Gandhi, R. L. Mancera, The structure of glycosaminoglycans and their  
19 interactions with proteins. *Chem. Biol. Drug Des.* **72**, 455–482 (2008).
- 20 6. A. Cartmell *et al.*, How members of the human gut microbiota overcome the  
21 sulfation problem posed by glycosaminoglycans. *Proc. Natl. Acad. Sci. USA* **114**,  
22 7037–7042 (2017).

- 1 7. B. Canard, T. Garnier, B. Saint-Joanis, S. T. Cole, Molecular genetic analysis of  
2 the *nagH* gene encoding a hyaluronidase of *Clostridium perfringens*. *Mol. Gen.*  
3 *Genet.* **243**, 215–224 (1994).
- 4 8. M. J. Jedrzejewski, Unveiling molecular mechanisms of bacterial surface proteins:  
5 *Streptococcus pneumoniae* as a model organism for structural studies. *Cell. Mol.*  
6 *Life Sci.* **64**, 2799–2822 (2007).
- 7 9. K. Kawai, R. Kamochi, S. Oiki, K. Murata, W. Hashimoto, Probiotics in human  
8 gut microbiota can degrade host glycosaminoglycans. *Sci. Rep.* **8**, 10674 (2018).
- 9 10. Y. Maruyama *et al.*, Metabolic fate of unsaturated glucuronic/iduronic acids from  
10 glycosaminoglycans: molecular identification and structure determination of  
11 streptococcal isomerase and dehydrogenase. *J. Biol. Chem.* **290**, 6281–92 (2015).
- 12 11. S. Oiki *et al.*, Streptococcal phosphotransferase system imports unsaturated  
13 hyaluronan disaccharide derived from host extracellular matrices. *PLoS One* **14**,  
14 e0224753 (2019).
- 15 12. E. S. Friedman *et al.*, Microbes vs. chemistry in the origin of the anaerobic gut  
16 lumen. *Proc. Natl. Acad. Sci. USA* **115**, 4170–4175 (2018).
- 17 13. N. L. Zitomersky *et al.*, Characterization of adherent *Bacteroidales* from intestinal  
18 biopsies of children and young adults with inflammatory bowel disease. *PLoS*  
19 *One* **8**, e63686 (2013).
- 20 14. F. Bäckhed *et al.*, Host-bacterial mutualism in the human intestine. *Science* **307**,  
21 1915–1920 (2005).
- 22 15. F. Sun *et al.*, A potential species of next-generation probiotics? The dark and light  
23 sides of *Bacteroides fragilis* in health. *Food Res. Int.* **126**, 108590 (2019).

- 1 16. N. A. Pudlo *et al.*, Symbiotic human gut bacteria with variable metabolic  
2 priorities for host mucosal glycans. *mBio* **6**, e01282-15 (2015).
- 3 17. D. Ndeh *et al.*, Metabolism of multiple glycosaminoglycans by *Bacteroides*  
4 *thetaiotaomicron* is orchestrated by a versatile core genetic locus. *Nat. Commun.*  
5 **11**, 646 (2020).
- 6 18. V. Raghavan, E. C. Lowe, G. E. 2nd Townsend, D. N. Bolam, E. A. Groisman,  
7 Tuning transcription of nutrient utilization genes to catabolic rate promotes  
8 growth in a gut bacterium. *Mol. Microbiol.* **93**, 1010–1025 (2014).
- 9 19. B. T. Layden, A. R. Angueira, M. Brodsky, V. Durai, W. L. Jr. Lowe, Short chain  
10 fatty acids and their receptors: new metabolic targets. *Transl. Res.* **161**, 131–140  
11 (2013).
- 12 20. B. S. Ramakrishna, Role of the gut microbiota in human nutrition and  
13 metabolism. *J. Gastroenterol. Hepatol.* **28**, 9–17 (2013).
- 14 21. A. G. Wexler, A. L. Goodman, An insider's perspective: *Bacteroides* as a window  
15 into the microbiome. *Nat. Microbiol.* **2**, 17026 (2017).
- 16 22. H. Tan, Q. Zhai, W. Chen, Investigations of *Bacteroides* spp. towards next-  
17 generation probiotics. *Food Res. Int.* **116**, 637–644 (2019).
- 18 23. M. P. Vélez, S. C. De Keersmaecker, J. Vanderleyden, Adherence factors of  
19 *Lactobacillus* in the human gastrointestinal tract. *FEMS Microbiol. Lett.* **276**,  
20 140–148 (2007).
- 21 24. M. E. Johansson, J. M. Larsson, G. C. Hansson, The two mucus layers of colon  
22 are organized by the MUC2 mucin, whereas the outer layer is a legislator of host-  
23 microbial interactions. *Proc. Natl. Acad. Sci. USA* **108**, 4659–4665 (2011).

- 1 25. C. Rose, A. Parker, B. Jefferson, E. Cartmell, The characterization of feces and  
2 urine: A review of the literature to inform advanced treatment technology. *Crit.*  
3 *Rev. Environ. Sci. Technol.* **45**, 1827–1879 (2015).
- 4 26. C. B. Whitley, M. D. Ridnour, K. A. Draper, C. M. Dutton, J. P. Neglia,  
5 Diagnostic test for mucopolysaccharidosis. I. Direct method for quantifying  
6 excessive urinary glycosaminoglycan excretion. *Clin. Chem.* **35**, 374–379 (1989).
- 7 27. R. F. Smith, N. P. Willett, Rapid plate method for screening hyaluronidase and  
8 chondroitin sulfatase-producing microorganisms. *Appl. Microbiol.* **16**, 1434–1436  
9 (1968).
- 10 28. Q. Shang *et al.*, Structural modulation of gut microbiota by chondroitin sulfate  
11 and its oligosaccharide. *Int. J. Biol. Macromol.* **89**, 489–498 (2016).
- 12 29. E. C. Martens *et al.*, Recognition and degradation of plant cell wall  
13 polysaccharides by two human gut symbionts. *PLoS Biol.* **9**, e1001221 (2011).
- 14 30. L. E. Tailford, E. H. Crost, D. Kavanaugh, N. Juge, Mucin glycan foraging in the  
15 human gut microbiome. *Front. Genet.* **6**, 81 (2015).
- 16 31. R. Lin, W. Liu, M. Piao, H. Zhu, A review of the relationship between the gut  
17 microbiota and amino acid metabolism. *Amino Acids* **49**, 2083–2090 (2017).
- 18 32. N. Zmora, *et al.*, Personalized gut mucosal colonization resistance to empiric  
19 probiotics is associated with unique host and microbiome features. *Cell* **174**,  
20 1388–1405 (2018).
- 21 33. P. Strandwitz *et al.*, GABA-modulating bacteria of the human gut microbiota.  
22 *Nat. Microbiol.* **4**, 396–403 (2019).
- 23 34. E. Patterson *et al.*, Gut microbiota, the pharmabiotics they produce and host  
24 health. *Proc. Nutr. Soc.* **73**, 477–489 (2014).

- 1 35. P. M. Smith *et al.*, The microbial metabolites, short-chain fatty acids, regulate  
2 colonic T<sub>reg</sub> cell homeostasis. *Science* **341**, 569–573 (2013).
- 3 36. J. H. Cummings, E. W. Pomare, W. J. Branch, C. P. Naylor, G. T. Macfarlane,  
4 Short chain fatty acids in human large intestine, portal, hepatic and venous blood.  
5 *Gut* **28**, 1221–1227 (1987).
- 6 37. R. S. Miller, L. C. Hoskins, Mucin degradation in human colon ecosystems. Fecal  
7 population densities of mucin-degrading bacteria estimated by a “most probable  
8 number” method. *Gastroenterology* **81**, 759–65 (1981).
- 9 38. S. Takahashi, J. Tomita, K. Nishioka, T. Hisada, M. Nishijima, Development of a  
10 prokaryotic universal primer for simultaneous analysis of Bacteria and Archaea  
11 using next-generation sequencing. *PLoS One* **9**, e105592 (2014).
- 12 39. T. Hisada, K. Endoh, K. Kuriki, Inter- and intra-individual variations in seasonal  
13 and daily stabilities of the human gut microbiota in Japanese. *Arch. Microbiol.*  
14 **197**, 919–34 (2015).
- 15 40. C. Kasai *et al.*, Comparison of the gut microbiota composition between obese and  
16 non-obese individuals in a Japanese population, as analyzed by terminal  
17 restriction fragment length polymorphism and next-generation sequencing. *BMC*  
18 *Gastroenterol.* **15**, 100 (2015).
- 19 41. A. A. Salyers, J. R. Vercellotti, S. E. H. West, T. D. Wilkins, Fermentation of  
20 mucin and plant polysaccharides by strains of *Bacteroides* from the human colon.  
21 *Appl. Environ. Microbiol.* **33**, 319-322 (1977).

22

## 23 **Acknowledgements**



1 This work was supported in part by Grants-in-Aid for Scientific Research from the  
2 Japan Society for the Promotion of Science (to W.H.), and Research Grant (to W.H.)  
3 from Yakult Bio-science Foundation. The authors would like to thank Enago  
4 (www.enago.com) for the English language review.

5

#### 6 **Author contributions**

7 W.H. designed the study; M.S., K.K., T.K., R.T., and W.H. performed the experiments;  
8 M.S., K.K., T.K., D.W., R.T., and W.H. analyzed the data; M.S., D.W., R.T., and W.H.  
9 wrote the manuscript.

10

#### 11 **Competing interests**

12 The authors declare no competing interests.

1 **Figure legends**

2 **Fig. 1.** Human gut microbiota changes in the presence of mucosubstances. (A) Genera  
3 (or *Bacteroides* species) frequency profiles of the fecal samples cultivated in the  
4 presence of a sole carbon source (Glc, mucin, HA, HP, or CSC). (B) Principal  
5 component analysis of the microbiota profiles. The factor loading plot (*left*) and the  
6 PCA score plot (*right*) are seen. For marker colors in the PCA score plot, see the  
7 symbol legend in (A).

8  
9 **Fig. 2.** Degradation of GAGs by *Bacteroides* species. The halo assay for GAG  
10 degradation after 7-day incubation with *Bacteroides* species. CSC (*left*) or HP (*right*)  
11 was part of the nutrient-rich medium plate.

12  
13 **Fig. 3.** Assimilation of GAGs by *Bacteroides* species. (A) Growth level (OD<sub>600</sub>) of  
14 *Bacteroides* species in GAG (CSC, HA, or HP) or mucin minimal medium is shown  
15 using the heat map with OD<sub>600</sub> from 0 (white) to 1.5 (black). (B) *Bacteroides faecis*  
16 growth-dependent degradation of CSC. Closed and open circles represent OD<sub>600</sub> values  
17 of the culture broth in the presence and absence of *B. faecis*, respectively. Closed and  
18 open squares are the CSC concentrations of the culture broth in the presence and  
19 absence of *B. faecis*, respectively. Error bars show standard deviations (n = 3).

20  
21 **Fig. 4.** Mutually beneficial symbiosis between human and *Bacteroides* species. (A)  
22 Secretion of amino acids from GAG (HA) and mucin by *Bacteroides* species. n.d., not  
23 detected. (B) Secretion of organic acids from GAG (HA) and mucin by *Bacteroides*  
24 species. n.d., not detected. (C) Symbiosis model. The human provides *Bacteroides*

- 1 species in the gut with extracellular mucosubstances (GAGs and mucin) for their
- 2 nutrition and residence place. *Bacteroides* species dominate gut microbiota by
- 3 assimilating host mucosubstances as a carbon/nitrogen source and secrete molecules
- 4 including amino acids and short-chain fatty acids which are essential in human health
- 5 promotion.
- 6

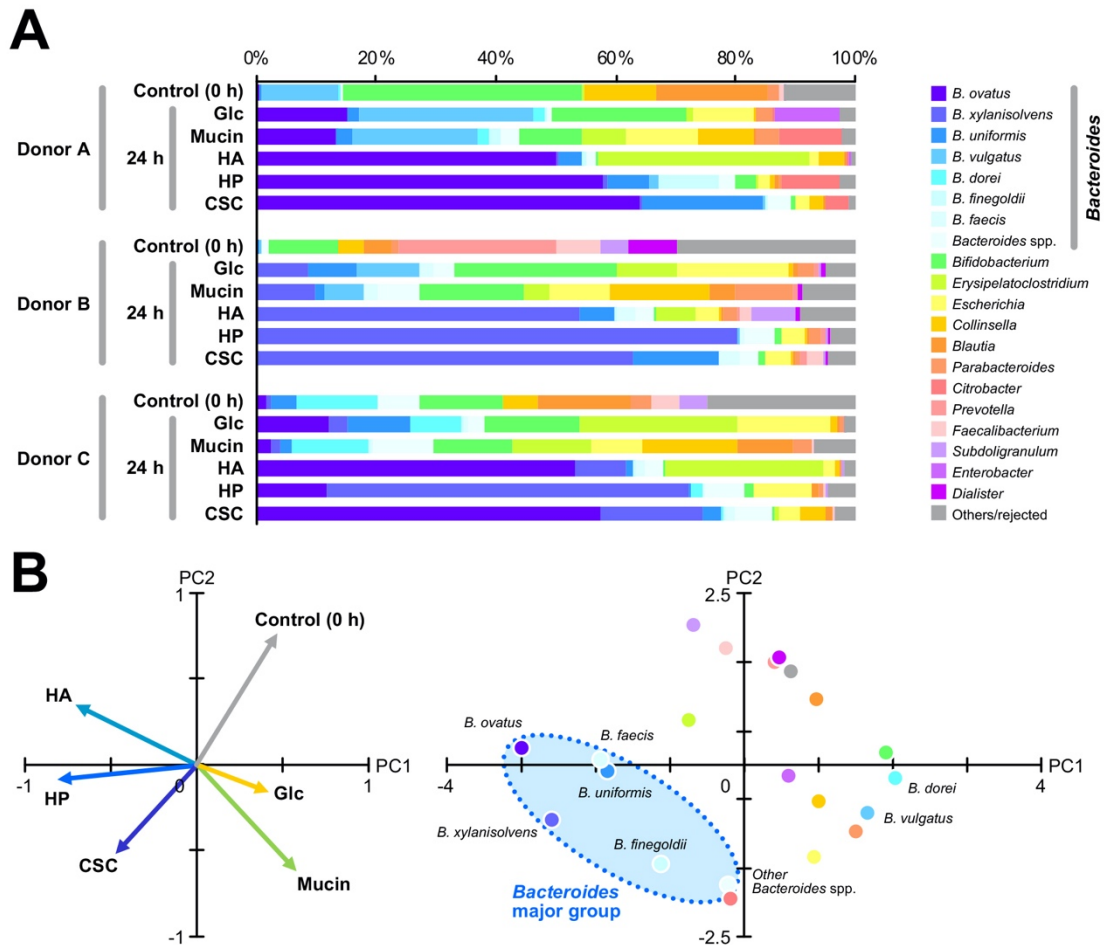

1

2

3 **Fig. 1.** Human gut microbiota changes in the presence of mucosubstances. (A) Genera

4 (or *Bacteroides* species) frequency profiles of the fecal samples cultivated in the

5 presence of a sole carbon source (Glc, mucin, HA, HP, or CSC). (B) Principal

6 component analysis of the microbiota profiles. The factor loading plot (*left*) and the

7 PCA score plot (*right*) are seen. For marker colors in the PCA score plot, see the

8 symbol legend in (A).

9

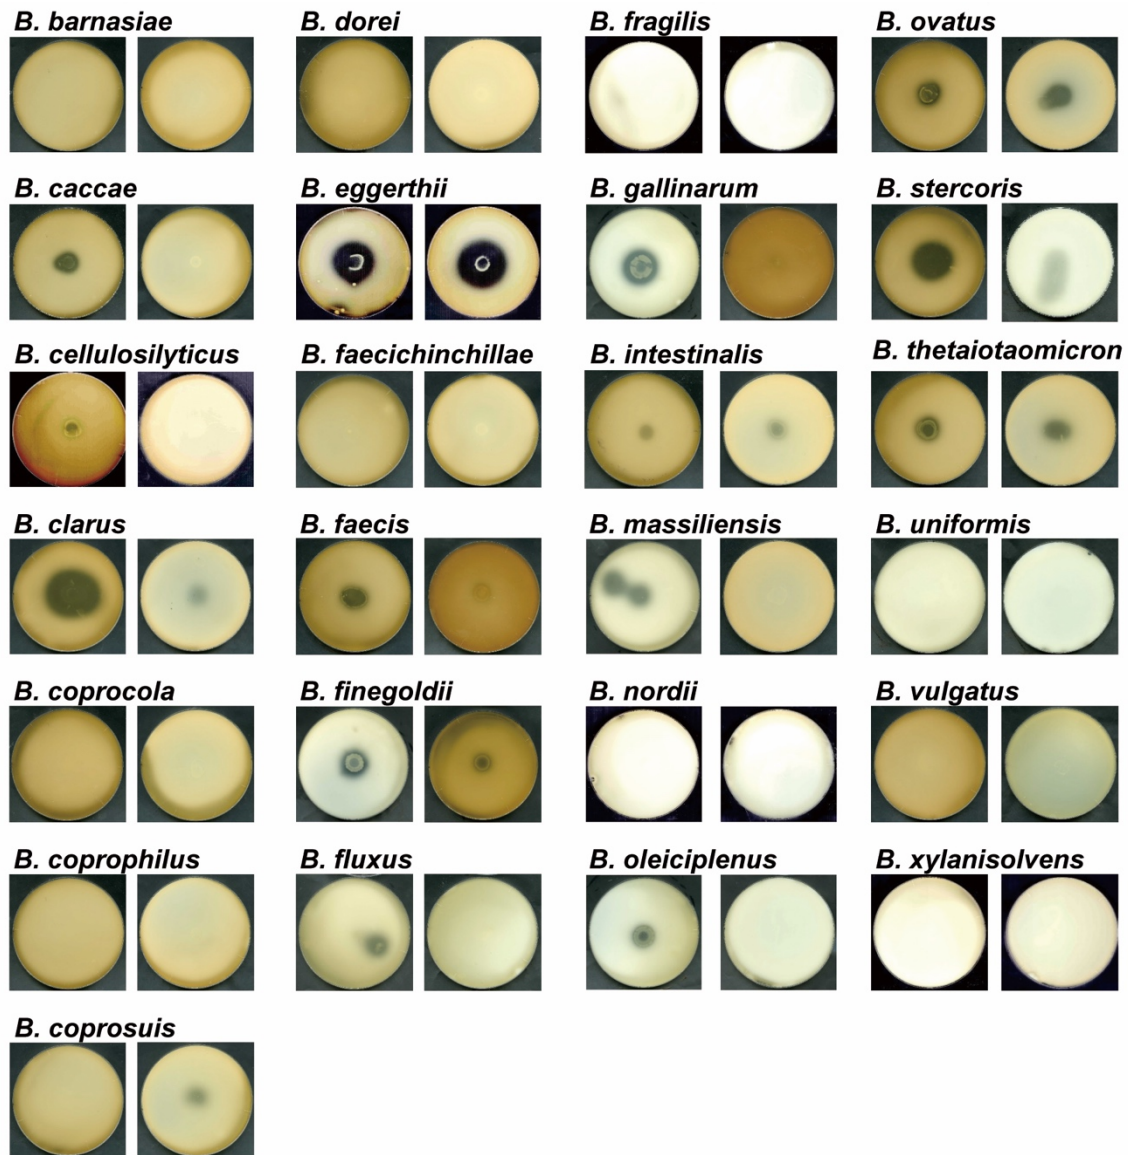

1

2

3 **Fig. 2.** Degradation of GAGs by *Bacteroides* species. The halo assay for GAG  
4 degradation after 7-day incubation with *Bacteroides* species. CSC (*left*) or HP (*right*)  
5 was part of the nutrient-rich medium plate.

6

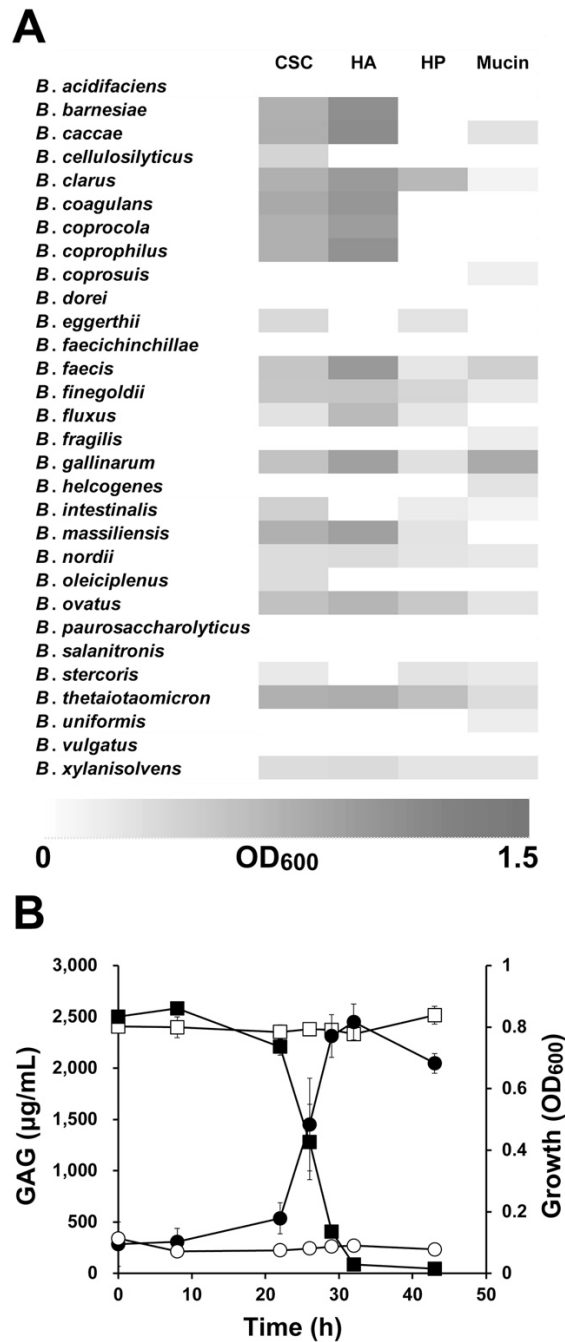

1

2 **Fig. 3.** Assimilation of GAGs by *Bacteroides* species. (A) Growth level (OD<sub>600</sub>) of  
 3 *Bacteroides* species in GAG (CSC, HA, or HP) or mucin minimal medium is shown  
 4 using the heat map with OD<sub>600</sub> from 0 (white) to 1.5 (black). (B) *Bacteroides faecis*  
 5 growth-dependent degradation of CSC. Closed and open circles represent OD<sub>600</sub> values  
 6 of the culture broth in the presence and absence of *B. faecis*, respectively. Closed and  
 7 open squares are the CSC concentrations of the culture broth in the presence and  
 8 absence of *B. faecis*, respectively. Error bars show standard deviations (n = 3).

1 **A**

|                      | <i>B. thetaiotaomicron</i> |                         | <i>B. ovatus</i>      |                         |
|----------------------|----------------------------|-------------------------|-----------------------|-------------------------|
|                      | GAG ( $\mu\text{M}$ )      | Mucin ( $\mu\text{M}$ ) | GAG ( $\mu\text{M}$ ) | Mucin ( $\mu\text{M}$ ) |
| Ala                  | 636.8 $\pm$ 32.9           | 20.8 $\pm$ 7.8          | 362.8 $\pm$ 188.2     | 17.2 $\pm$ 14.7         |
| Arg                  | n.d.                       | 10.7 $\pm$ 4.3          | 0.5 $\pm$ 0.9         | 10.5 $\pm$ 4.9          |
| Asn                  | 8.0 $\pm$ 6.4              | 5.0 $\pm$ 5.6           | 59.0 $\pm$ 44.1       | 8.7 $\pm$ 4.8           |
| Asp                  | n.d.                       | 1.0 $\pm$ 0.3           | 14.0 $\pm$ 21.8       | 0.5 $\pm$ 0.6           |
| Cys                  | n.d.                       | n.d.                    | n.d.                  | n.d.                    |
| Gln                  | 0.2 $\pm$ 0.1              | 0.3 $\pm$ 0.3           | 2.0 $\pm$ 3.5         | 0.4 $\pm$ 0.7           |
| Glu                  | 41.9 $\pm$ 20.1            | 10.6 $\pm$ 4.1          | 98.3 $\pm$ 58.5       | 9.0 $\pm$ 2.2           |
| Gly                  | 14.8 $\pm$ 0.7             | 6.9 $\pm$ 2.4           | 19.8 $\pm$ 7.3        | 6.7 $\pm$ 1.0           |
| His                  | n.d.                       | 2.7 $\pm$ 0.2           | 3.3 $\pm$ 4.1         | 2.4 $\pm$ 1.8           |
| Ile                  | 18.5 $\pm$ 3.4             | 2.1 $\pm$ 0.4           | 25.7 $\pm$ 13.1       | 1.6 $\pm$ 0.4           |
| Leu                  | 15.2 $\pm$ 3.1             | 2.9 $\pm$ 0.3           | 24.4 $\pm$ 10.5       | 2.5 $\pm$ 0.3           |
| Lys                  | n.d.                       | 19.7 $\pm$ 21.4         | 2.2 $\pm$ 3.4         | 19.0 $\pm$ 20.3         |
| Met                  | 4.8 $\pm$ 2.0              | 1.3 $\pm$ 0.4           | 7.1 $\pm$ 5.5         | 0.9 $\pm$ 0.4           |
| Phe                  | 5.1 $\pm$ 1.8              | 2.0 $\pm$ 0.1           | 6.0 $\pm$ 2.6         | 1.9 $\pm$ 0.6           |
| Pro                  | 17.1 $\pm$ 3.5             | 19.4 $\pm$ 4.9          | 24.1 $\pm$ 10.5       | 12.6 $\pm$ 14.4         |
| Ser                  | 1.5 $\pm$ 1.3              | 0.3 $\pm$ 0.4           | 1.2 $\pm$ 2.6         | n.d.                    |
| Thr                  | 5.0 $\pm$ 0.5              | 0.2 $\pm$ 0.2           | 5.4 $\pm$ 1.8         | 0.2 $\pm$ 0.1           |
| Trp                  | n.d.                       | 0.2 $\pm$ 0.3           | 2.0 $\pm$ 3.5         | 0.1 $\pm$ 0.2           |
| Tyr                  | 3.5 $\pm$ 0.6              | 1.1 $\pm$ 0.0           | 4.4 $\pm$ 2.6         | 1.2 $\pm$ 0.5           |
| Val                  | 37.3 $\pm$ 0.7             | 4.1 $\pm$ 1.2           | 55.0 $\pm$ 14.8       | 3.4 $\pm$ 1.4           |
| $\alpha$ -ABA        | 10.0 $\pm$ 0.9             | 0.9 $\pm$ 0.1           | 11.8 $\pm$ 0.9        | 0.6 $\pm$ 0.1           |
| $\gamma$ -ABA        | 207.9 $\pm$ 84.4           | n.d.                    | 108.3 $\pm$ 84.6      | 0.1 $\pm$ 0.1           |
| $\beta$ -Ala         | 0.9 $\pm$ 0.3              | n.d.                    | 2.1 $\pm$ 0.6         | n.d.                    |
| Citrulline           | n.d.                       | 0.2 $\pm$ 0.2           | 0.2 $\pm$ 0.3         | 0.1 $\pm$ 0.2           |
| EtOH NH <sub>2</sub> | 9.3 $\pm$ 1.1              | 2.7 $\pm$ 0.9           | 9.6 $\pm$ 3.1         | 2.5 $\pm$ 3.2           |
| Hypro                | n.d.                       | n.d.                    | n.d.                  | 2.1 $\pm$ 3.7           |
| Ornithine            | n.d.                       | 0.1 $\pm$ 0.2           | n.d.                  | n.d.                    |
| PEA                  | 8.5 $\pm$ 4.0              | 0.3 $\pm$ 2.4           | 22.5 $\pm$ 11.4       | 1.0 $\pm$ 1.9           |
| P-Ser                | 4.1 $\pm$ 1.2              | 1.4 $\pm$ 7.6           | 23.5 $\pm$ 0.7        | 6.5 $\pm$ 1.7           |
| Sarcosine            | n.d.                       | 1.1 $\pm$ 1.9           | 3.5 $\pm$ 0.9         | 0.4 $\pm$ 0.7           |
| Urea                 | n.d.                       | 55.7 $\pm$ 28.3         | 113.7 $\pm$ 80.7      | 51.4 $\pm$ 4.8          |

2 **B**

|                | <i>B. thetaiotaomicron</i> |                 | <i>B. ovatus</i> |                 | <i>B. faecis</i> |                 |
|----------------|----------------------------|-----------------|------------------|-----------------|------------------|-----------------|
|                | GAG (mM)                   | Mucin (mM)      | GAG (mM)         | Mucin (mM)      | GAG (mM)         | Mucin (mM)      |
| Succinic acid  | 1.08 $\pm$ 0.59            | 0.05 $\pm$ 0.00 | 0.86 $\pm$ 0.28  | n.d.            | 0.66 $\pm$ 0.14  | 0.10 $\pm$ 0.01 |
| Lactic acid    | 3.63 $\pm$ 1.21            | n.d.            | 2.22 $\pm$ 0.14  | n.d.            | 2.46 $\pm$ 0.90  | 0.09 $\pm$ 0.01 |
| Formic acid    | 3.04 $\pm$ 2.10            | n.d.            | 2.82 $\pm$ 2.16  | n.d.            | 2.12 $\pm$ 1.38  | 0.27 $\pm$ 0.02 |
| Acetic acid    | 14.93 $\pm$ 1.65           | 1.16 $\pm$ 0.11 | 14.00 $\pm$ 1.56 | 0.69 $\pm$ 0.02 | 12.49 $\pm$ 2.92 | 1.66 $\pm$ 0.10 |
| Propionic acid | 1.42 $\pm$ 0.55            | 0.51 $\pm$ 0.04 | 1.66 $\pm$ 0.47  | 0.22 $\pm$ 0.01 | 1.86 $\pm$ 0.61  | 1.02 $\pm$ 0.06 |

3 **C**

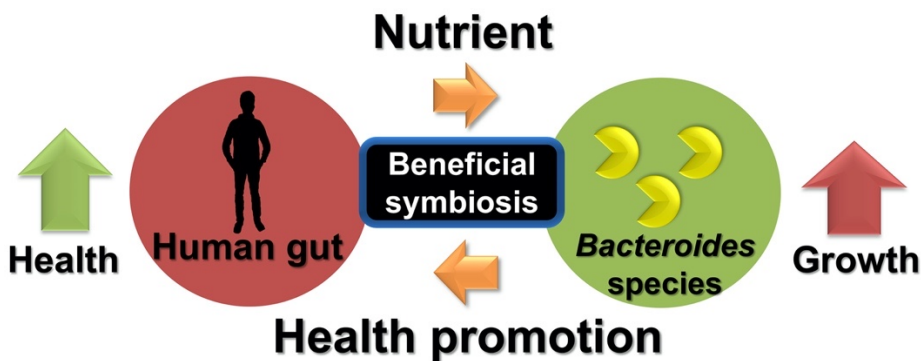

4

5 **Fig. 4.** Mutually beneficial symbiosis between human and *Bacteroides* species. (A)  
6 Secretion of amino acids from GAG (HA) and mucin by *Bacteroides* species. n.d., not  
7 detected. (B) Secretion of organic acids from GAG (HA) and mucin by *Bacteroides*  
8 species. n.d., not detected. (C) Symbiosis model. The human provides *Bacteroides*  
9 species in the gut with extracellular mucosubstances (GAGs and mucin) for their  
10 nutrition and residence place. *Bacteroides* species dominate gut microbiota by  
11 assimilating host mucosubstances as a carbon/nitrogen source and secrete molecules  
12 including amino acids and short-chain fatty acids which are essential in human health  
13 promotion.
